# Supplementary material for: Hydrological change in southern Australia over 1750 years: a bivalve oxygen isotope record from the Coorong Lagoon
Source: Copernicus journal article supplement (doi:10.5194/cp-19-1383-2023), 2023-07-18
Supplement: Supplementary file 1 [file cp-19-1383-2023-supplement.pdf]

Supplement of *Clim. Past*, 19, 1383–1396, 2023  
<https://doi.org/10.5194/cp-19-1383-2023-supplement>  
© Author(s) 2023. CC BY 4.0 License.

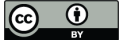

*Supplement of*

## **Hydrological change in southern Australia over 1750 years: a bivalve oxygen isotope record from the Coorong Lagoon**

**Briony Kate Chamberlayne et al.**

*Correspondence to:* Jonathan James Tyler ([jonathan.tyler@adelaide.edu.au](mailto:jonathan.tyler@adelaide.edu.au))

The copyright of individual parts of the supplement might differ from the article licence.

## Supplementary information

**Table S1. Results from the AMS  $^{14}\text{C}$  analyses used to construct the age model in Bacon (Blaauw and Christen, 2011). Italicised samples were identified as outliers and excluded from the age model. Calibrated years BP (Cal yr BP) represents the 'best' estimation of calibrated age calculated in the age model where present is 1950 CE. Samples with prefix '-Wk' were dated at Waikato University, those with the prefix 'OZ' were dated at the Australian Nuclear Science and Technology Organisation (ANSTO) AMS facility (Fink et al. 2004).**

| Laboratory ID | Sample type            | $^{14}\text{C}$ age | $^{14}\text{C}$ age with offset applied | $1\sigma$ error | Depth (cm) | Cal yr BP |
|---------------|------------------------|---------------------|-----------------------------------------|-----------------|------------|-----------|
| surface       |                        | -55                 | -55                                     | 1               | 0          | -55       |
| OZZ021        | <i>A. helmsi</i> shell | 1030                | 214                                     | 32              | 5.5        | -10       |
| OZS803        | <i>A. helmsi</i> shell | 1720                | 904                                     | 27              | 9.5        | 33        |
| OZZ022        | <i>A. helmsi</i> shell | 985                 | 169                                     | 32              | 10.5       | 45        |
| OZZ023        | <i>A. helmsi</i> shell | 985                 | 169                                     | 32              | 16.5       | 117.5     |
| OZS804        | <i>A. helmsi</i> shell | 985                 | 169                                     | 27              | 20.5       | 167.5     |
| Wk-24750      | <i>A. helmsi</i> shell | 1584                | 768                                     | 32              | 30.5       | 302.5     |
| OZZ024        | <i>A. helmsi</i> shell | 1575                | 759                                     | 36              | 30.5       | 302.5     |
| OZS805        | <i>A. helmsi</i> shell | 1320                | 504                                     | 27              | 45.5       | 506       |
| OZZ025        | <i>A. helmsi</i> shell | 1505                | 689                                     | 32              | 55.5       | 612.5     |
| OZS806        | <i>A. helmsi</i> shell | 1665                | 849                                     | 22              | 65.5       | 726       |
| Wk-24751      | <i>A. helmsi</i> shell | 1987                | 1171                                    | 32              | 82.5       | 1056.5    |
| OZZ026        | <i>A. helmsi</i> shell | 2235                | 1419                                    | 35              | 89.5       | 1262      |
| OZS807        | <i>A. helmsi</i> shell | 2420                | 1604                                    | 27              | 95.5       | 1384      |
| OZZ027        | <i>A. helmsi</i> shell | 2365                | 1549                                    | 32              | 106.5      | 1494      |
| OZS808        | <i>A. helmsi</i> shell | 2630                | 1814                                    | 27              | 115.5      | 1617.5    |
| OZZ028        | <i>A. helmsi</i> shell | 2565                | 1749                                    | 36              | 122.5      | 1679      |
| Wk-24752      | <i>A. helmsi</i> shell | 2638                | 1822                                    | 32              | 129.5      | 1755      |
